# Supplementary material for: Microbiological Insights into the Stress-Alleviating Property of an Endophytic Bacillus altitudinis WR10 in Wheat under Low-Phosphorus and High-Salinity Stresses
Source: PubMed Central journal article supplement (PMC6920878; doi:10.3390/microorganisms7110508), 2019-10-29
Supplement: microorganisms-07-00508-s001.pdf [file microorganisms-07-00508-s001.pdf]

# Supplementary information

**Table S1** Physiological characteristics of *Bacillus altitudinis* WR10 evaluated by API 50CHB

| Substrates                         | Results |
|------------------------------------|---------|
| Control                            | -       |
| Glycerol                           | ++      |
| Erythritol                         | -       |
| D-arabinose                        | -       |
| L-arabinose                        | +       |
| D-ribose                           | +       |
| D-xylose                           | +       |
| L-xylose                           | -       |
| D-adonitol                         | -       |
| $\beta$ -methyl-D-xylopyranoside   | -       |
| D-galactose                        | +       |
| D-glucose                          | ++      |
| D-fructose                         | ++      |
| D-mannose                          | ++      |
| L-sorbose                          | -       |
| L-rhamnose                         | +       |
| dulcitol                           | -       |
| inositol                           | +       |
| D-mannitol                         | +       |
| D-sorbitol                         | +       |
| $\alpha$ -methyl-D-mannopyranoside | -       |
| $\alpha$ -methyl-D-glucopyranoside | +       |
| <i>N</i> -acetyl-D-glucosamine     | +       |
| Amygdalin                          | +       |
| Arbutin                            | ++      |
| Esculin ferric citrate             | ++      |
| Salicin                            | ++      |
| D-cellobiose                       | ++      |
| D-maltose                          | ++      |
| D-lactose                          | -       |
| D-melibiose                        | +       |
| Sucrose                            | ++      |
| D-trehalose                        | ++      |
| Inulin                             | -       |
| D-melezitose                       | -       |
| D-raffinose                        | +       |
| Starch                             | +       |
| Glycogen                           | +       |
| Xylitol                            | -       |
| Gentiobiose                        | -       |
| D-turanose                         | +       |
| D-lyxose                           | -       |

---

|                           |   |
|---------------------------|---|
| D-tagatose                | - |
| D-fucose                  | - |
| L-fucose                  | - |
| D-arabitol                | - |
| L-arabitol                | - |
| Potassium gluconate       | + |
| Potassium 2-ketogluconate | - |
| Potassium 5-ketogluconate | - |

---

++, strongly positive; +, weakly positive; -, negative

**Table S2** Biochemical characteristics of *Bacillus altitudinis* WR10 evaluated by BiologGen III

| <b>Carbon sources</b>            | <b>Results</b> |
|----------------------------------|----------------|
| Negative Control                 | -              |
| Positive Control                 | ++             |
| Dextrin                          | -              |
| D-maltose                        | ++             |
| D-trehalose                      | ++             |
| D-cellobiose                     | ++             |
| Gentiobiose                      | -              |
| Sucrose                          | -              |
| D-turanose                       | ++             |
| Stachyose                        | -              |
| D-raffinose                      | -              |
| $\alpha$ -D-lactose              | -              |
| D-melibiose                      | -              |
| $\beta$ -methyl-D-glucoside      | ++             |
| D-salicin                        | -              |
| N-acetyl-D-glucosamine           | -              |
| N-acetyl- $\beta$ -D-mannosamine | -              |
| N-acetyl-D-galactosamine         | -              |
| N-acetyl neuraminic acid         | -              |
| D-glucose                        | ++             |
| D-mannose                        | -              |
| D-fructose                       | ++             |
| D-galactose                      | -              |
| 3-methyl glucose                 | -              |
| D-fucose                         | -              |
| L-fucose                         | -              |
| L-rhamnose                       | -              |
| Inosine                          | -              |
| 1% Sodium lactate                | -              |
| Fusidicacid                      | -              |
| D-serine                         | -              |
| D-sorbitol                       | -              |
| D-mannitol                       | ++             |
| D-arabitol                       | ++             |
| myo-Inositol                     | ++             |
| Glycerol                         | -              |
| D-glucose-6-phosphate            | -              |
| D-fructose-6-phosphate           | -              |
| D-aspartic acid                  | -              |
| D-serine                         | -              |

---

|                                   |    |
|-----------------------------------|----|
| Troleandomycin                    | -  |
| Rifamycin SV                      | -  |
| Minocycline                       | ++ |
| Gelatin                           | ++ |
| Glycyl-L-proline                  | -  |
| L-alanine                         | ++ |
| L-arginine                        | -  |
| L-aspartic acid                   | -  |
| L-glutamic acid                   | -  |
| L-histidine                       | ++ |
| L-pyroglutamic acid               | -  |
| L-serine                          | -  |
| Lincomycin                        | -  |
| Guanidine HCl                     | -  |
| Niaproof 4                        | -  |
| Pectin                            | ++ |
| D-galacturonic acid               | -  |
| L-galactonicacid lactone          | -  |
| D-gluconic acid                   | -  |
| D-glucuronic acid                 | -  |
| Glucuronamide                     | -  |
| Mucicacid                         | -  |
| Quinicacid                        | -  |
| D-saccharicacid                   | -  |
| Vancomycin                        | -  |
| Tetrazolium violet                | ++ |
| Tetrazolium blue                  | -  |
| p-hydroxy-phenylacetic acid       | -  |
| Methyl pyruvate                   | -  |
| D-Lactic acid methyl ester        | -  |
| L-lactic acid                     | -  |
| Citric acid                       | -  |
| $\alpha$ -keto-glutaric acid      | -  |
| D-malic acid                      | -  |
| L-malic acid                      | -  |
| Bromo-succinic acid               | -  |
| Nalidixic acid                    | -  |
| Lithium chloride                  | -  |
| Potassium tellurite               | -  |
| Tween 40                          | -  |
| $\gamma$ -amino-butryricacid      | -  |
| $\alpha$ -hydroxy-butyrac acid    | ++ |
| $\beta$ -hydroxy-D,L-butyrac acid | -  |

---

---

|                             |   |
|-----------------------------|---|
| $\alpha$ -keto-butyric acid | - |
| Acetoacetic acid            | - |
| Propionic acid              | - |
| Acetic acid                 | - |
| Formic acid                 | - |
| Aztreonam                   | - |
| Sodium butyrate             | - |
| Sodium bromate              | - |

---

++, strongly positive; +, weakly positive; -, negative

**Table S3.** Enzymatic profile of *Bacillus altitudinis* WR10 evaluated by API ZYM.

| <b>Determined enzymes</b>                  | <b>Results</b> |
|--------------------------------------------|----------------|
| Control                                    | -              |
| Alkaline phosphatase                       | +              |
| Esterase(C4)                               | +              |
| Esterase lipase(C8)                        | +              |
| Lipase(C14)                                | -              |
| Leucine arylamidase                        | -              |
| Valine arylamidase                         | -              |
| Cystine arylamidase                        | -              |
| Trypsin                                    | -              |
| $\alpha$ -chymotrypsin                     | -              |
| Acid phosphatase                           | +              |
| Naphthol-AS-BI-phosphohydrolase            | -              |
| $\alpha$ -galactosidase                    | -              |
| $\beta$ -galactosidase                     | -              |
| $\beta$ -glucuronidase                     | -              |
| $\alpha$ -glucosidase                      | -              |
| $\beta$ -glucosidase                       | -              |
| <i>N</i> -acetyl- $\beta$ -glucosaminidase | -              |
| $\alpha$ -mannosidase                      | -              |
| $\alpha$ -fucosidase                       | -              |

+, positive; -, negative

**Table S4** Biochemical characteristics of *Bacillus altitudinis* WR10 evaluated by API 20NE

| <b>Substrates</b>                   | <b>reaction/enzyme</b>           | <b>Results</b> |
|-------------------------------------|----------------------------------|----------------|
| KNO <sub>3</sub>                    | NO <sub>3</sub> →NO <sub>2</sub> | +              |
|                                     | NO <sub>3</sub> →N <sub>2</sub>  | -              |
| Tryptophane                         | Indole production                | -              |
| D-Glucose                           | Acidification                    | +              |
| Arginine                            | Arginine dihydrolase             | -              |
| Urea                                | Urease                           | -              |
| Esculin ferric citrate              | Hydrolysis (β-glucosidase)       | +              |
| Gelatin                             | Hydrolysis (protease)            | +              |
| p-nitrophenyl-β-D-galactopyranoside | β-galactosidase                  | +              |
| D-Glucose                           | Assimilation                     | -              |
| L-arabinose                         | Assimilation                     | +              |
| D-mannose                           | Assimilation                     | -              |
| D-mannitol                          | Assimilation                     | -              |
| N-acetyl-D-glucosamine              | Assimilation                     | +              |
| D-maltose                           | Assimilation                     | +              |
| Gluconate                           | Assimilation                     | +              |
| Capric acid                         | Assimilation                     | -              |
| Adipic acid                         | Assimilation                     | -              |
| Malic acid                          | Assimilation                     | -              |
| Sodium citrate                      | Assimilation                     | +              |
| Phenylacetic acid                   | Assimilation                     | -              |

+, positive; -, negative

**Table S5** The relative germination rate of different wheat cultivars under 200mM NaCl

| <b>Cultivar</b> | <b>NaCl sensitivity</b> | <b>WR10 -</b> | <b>WR10 +</b> |
|-----------------|-------------------------|---------------|---------------|
| Zhoumai 26      | Moderate resistant      | 68%           | 82%           |
| Zhoumai 36      | Highly sensitive        | 8%            | 26%           |
| Xilong 1376     | Highly resistant        | 83%           | 98%           |
| Xilong 2611     | Slight resistant        | 50%           | 75%           |

Note: WR10 -, without addition of *B. altitudinis* WR10; WR10 +, supplemented with 10<sup>6</sup>cfu/mL *B. altitudinis* WR10 cells. Co-culture was conducted in Hoagland's complete nutrient solution for a week. Data were mean of 25 seeds in triplicate experiments.
